# Supplementary material for: Legionella spp. Colonization in Water Systems of Hotels Linked with Travel-Associated Legionnaires’ Disease
Source: MDPI journal article supplement (doi:10.3390/w13162243), 2021-08-17
Supplement: s1 [file s1]

Archive with 1 entries (1 files):
- water-1294666-supplementary.pdf
