# Supplementary material for: Legionella spp. Colonization in Water Systems of Hotels Linked with Travel-Associated Legionnaires’ Disease
Source: MDPI journal article supplement (doi:10.3390/w13162243), 2021-08-17
Supplement: s1 [file s1 › water-1294666-supplementary.pdf]

## Supplementary Material

**Table S1.** Summary laboratory examination results for *Legionella* spp. by culture per sample type.

| Total Samples Collected                                           |                                                       |            |
|-------------------------------------------------------------------|-------------------------------------------------------|------------|
| Sample type                                                       | Number of samples (%/ 95% Confidence Interval Limits) | Hotels (%) |
| Cold water distribution system                                    | 1885 (56.93/ 55.24-58.61)                             | 132 (-)    |
| Hot water distribution system                                     | 1387 (41.89/ 40.22-43.58)                             | 129 (-)    |
| Sediment from room shower water sample and from filtering systems | 37 (1.12/ 0.81-1.54)                                  | 13 (-)     |
| Soil                                                              | 2 (0.06/ 0.02-0.22)                                   | 1 (-)      |
| Total                                                             | 3311                                                  | -          |
| Positive samples                                                  |                                                       |            |
| Cold water distribution system                                    | 320 (46.72/ 43.01-50.46)                              | 71 (53.79) |
| Hot water distribution system                                     | 360 (52.55/ 48.81-56.27)                              | 70 (54.26) |
| Sediment from room shower water sample and from filtering systems | 5 (0.73/ 0.31-1.70)                                   | 3 (23.08)  |
| Soil                                                              | -                                                     | -          |
| Total                                                             | 685 (100.00)                                          | -          |

**Table S2.** Concentrations of *Legionella non pneumophila* spp. in samples collected from water systems (CFU/L).

| <i>Legionella non pneumophila</i><br><i>spp.</i> | <i>L. anisa</i> | <i>L. rubrilucens</i> | <i>L. erythra</i> | <i>L. londiniesis</i> | <i>L. taurinensis</i> | <i>L. santicrusis</i> | <i>L. oakridgensis</i> | <i>L. birminghamensis</i> | <i>L. tusconensis</i> | <i>L. brunensis</i> | <i>L. maceachernii</i> | Other<br>species |
|--------------------------------------------------|-----------------|-----------------------|-------------------|-----------------------|-----------------------|-----------------------|------------------------|---------------------------|-----------------------|---------------------|------------------------|------------------|
| Number of samples                                | 47              | 25                    | 46                | 11                    | 20                    | 2                     | 2                      | 3                         | 1                     | 3                   | 1                      | 64               |
| Mean                                             | 251,57.4<br>5   | 109,59.2              | 341,56.96         | 4309.09               | 348,87.5              | 50                    | 125                    | 217,33.33                 | 65,000                | 45,500              | 330,000                | 6036.72          |
| Median                                           | 3000            | 650                   | 1100              | 250                   | 625                   | 50                    | 125                    | 150                       | 65000                 | 52,000              | 330,000                | 575              |
| Std. Deviation                                   | 61,715.4<br>4   | 27,110.403            | 112,126.94<br>9   | 9370.534              | 144,857.859           | 0                     | 35.355                 | 37,470.066                | -                     | 23,436.083          | -                      | 31,328.949       |
| Minimum                                          | 50              | 50                    | 50                | 50                    | 50                    | 50                    | 100                    | 50                        | 65,000                | 19,500              | 330,000                | 50               |
| Maximum                                          | 350,000         | 130,000               | 660,000           | 32,000                | 650,000               | 50                    | 150                    | 65,000                    | 65,000                | 65,000              | 330,000                | 250,000          |
| Cold water samples                               |                 |                       |                   |                       |                       |                       |                        |                           |                       |                     |                        |                  |
| Number of samples                                | 29              | 14                    | 21                | 3                     | 13                    | 0                     | 0                      | 2                         | 1                     | 3                   | 1                      | 40               |
| Mean                                             | 20,741.3<br>8   | 17,945                | 33,124.76         | 50                    | 3488.46               | -                     | -                      | 32,525                    | 65,000                | 45,500              | 330,000                | 7963.75          |
| Median                                           | 2500            | 400                   | 400               | 50                    | 700                   | -                     | -                      | 32,525                    | 65,000                | 52,000              | 330,000                | 550              |
| Std. Deviation                                   | 46,184.7<br>7   | 35,087.425            | 84,553.193        | 0                     | 5584.508              | -                     | -                      | 45,926.585                | -                     | 23,436.083          | -                      | 39,453.507       |
| Minimum                                          | 50              | 50                    | 50                | 50                    | 50                    | -                     | -                      | 50                        | 65,000                | 19,500              | 330,000                | 50               |
| Maximum                                          | 230,000         | 130,000               | 330,000           | 50                    | 19,500                | -                     | -                      | 65,000                    | 65,000                | 65,000              | 330,000                | 250,000          |
| Hot water samples                                |                 |                       |                   |                       |                       |                       |                        |                           |                       |                     |                        |                  |
| Number of samples                                | 18              | 11                    | 24                | 8                     | 6                     | 2                     | 2                      | 1                         | 0                     | 0                   | 0                      | 24               |
| Mean                                             | 32,272.2<br>2   | 2068.18               | 36,087.5          | 5906.25               | 10,8691.67            | 50                    | 125                    | 150                       | -                     | -                   | -                      | 2825             |
| Median                                           | 6500            | 650                   | 1125              | 3025                  | 250                   | 50                    | 125                    | 150                       | -                     | -                   | -                      | 775              |
| Std. Deviation                                   | 81,890.5        | 2862.628              | 135,463.09<br>2   | 10,712.091            | 265,186.411           | 0                     | 35.355                 | -                         | -                     | -                   | -                      | 5641.461         |
| Minimum                                          | 50              | 50                    | 100               | 50                    | 50                    | 50                    | 100                    | 150                       | -                     | -                   | -                      | 50               |
| Maximum                                          | 350,000         | 6500                  | 660,000           | 32,000                | 650,000               | 50                    | 150                    | 150                       | -                     | -                   | -                      | 21,050           |
| Swab samples*                                    |                 |                       |                   |                       |                       |                       |                        |                           |                       |                     |                        |                  |
| Number of samples                                | 0               | 0                     | 1                 | 0                     | 1                     | 0                     | 0                      | 0                         | 0                     | 0                   | 0                      | 0                |

\*collected from the internal surfaces of showerheads.

**Table S3.** Inspection results of hotel water distribution systems.

| Inspection item                                                                                          | %    |
|----------------------------------------------------------------------------------------------------------|------|
| No water storage tanks protection                                                                        | 100  |
| * The showers are NOT clean and free of salts                                                            | 81.2 |
| * The residual chlorine <0.2 mg/L                                                                        | 72.8 |
| The hot water temperature is <50 °C. after 1 min of flushing                                             | 63.6 |
| The cold-water temperature in taps is >25 °C. after 2 min of flushing                                    | 54.5 |
| Water store and circulation temperature <60 °C                                                           | 54.5 |
| The water exiting the heating unit <60 °C and returning <50 °C                                           | 54.5 |
| The amount of stored water is > 1 day                                                                    | 45.5 |
| There is NO recording book for monitoring                                                                | 45.5 |
| * The outgoing temperature (cold) water from the tank is >25 °C                                          | 36.3 |
| There are leaks in the distribution system                                                               | 27.2 |
| * NO random sampling for water microbiological examination at least every 6 months                       | 27.2 |
| There is no thermal stratification of the water inside the heaters and storage water                     | 27.2 |
| The water distribution system cannot provide adequate water supply at peak times                         | 18.2 |
| No stable water consumption through the week                                                             | 18.2 |
| * <i>Legionella</i> detected the last six months (at a concentration of more than 10 <sup>3</sup> CFU/L) | 18.2 |
| The filters are NOT in good condition                                                                    | 9    |
| * The distribution system is NOT cleaned and disinfected when remained out of service > 1 month          | 9    |
| * The distribution system and the tanks NOT cleaned with appropriate disinfectants at least annually     | 9    |
| The water supply is interrupted for a long time                                                          | 9    |
| * The difference in temperature between 2 successive measurements of hot water is >10 °C/1 min           | 9    |
| There is a water taste and odor problem                                                                  | 9    |
